# Supplementary material
Source: Springer Nature journal article supplement (https://www.springermedizin.de/resource/supplementary/12985_2007_331_MOESM1_ESM.pdf/9607538)
Supplement: MOESM1 [file 9607538]

**G39d:** M2e M2e S1 S2 S2 S1 M2e M2e  
A-K-G-K-G-K-G-K-G-C---C-G-K-G-K-G-K-G-K-A

**G40d:** M2e M2e S1 S1 M2e M2e  
A-K-G-K-G-K-G-C---C-G-K-G-K-G-K-A

**Cys-M2e:** M2e M2e  
C-G-K-G-K-A

**Cys-bb:** C-G-K-G-K-A

**S1:** SFERFEIFPKE

**S2:** HNTNGVTAASSHE

**M2e:** SLLTEVETPIRNEWGSRSDSSDP
